# Supplementary material for: Relative merits of phononics vs. plasmonics: the energy balance approach
Source: publisher site journal article supplement (doi:10.1515/nanoph-2017-0048), 2017-09-05
Supplement: Supplementary file 1 [file nanoph-2017-0048_suppl.docx]

**Relative merits of Phononics vs. Plasmonics: the energy balance approach.**

**Supplementary Information**

**Derivation of the expression for group velocity of the SPhP (Eq.41)**

We start with the expression (40)

and re-write it as

Next we differentiate both sides of over frequency

Assuming that group and phase velocities in cladding are the same, i.e. we obtain

Next take the square of Eq as

and substitute it it into the r.h.s. of to obtain

and then

Which leads to the expression for the inverse group velocity

Once we calculate the dispersive term

We indeed obtain

which is equivalent to the first equality of Eq (40) in the main text.

To proceed further we note that i.e.

And also

Well then

Which confirms the second equality in (40).

**Derivation of the expression for the group velocity of the guided bulk polariton mode (Eq.45)**

We start with Eq (44) in the main text written as

and differentiate it over frequency. Derivative of the left side yields

and derivative of the r.h.s. yields

Then we get

Where in the last step we assumed that and thus obtained Eq.45 in the main text
